# Supplementary material for: Endoscopic full-thickness resection using a clip non-exposed method for gastrointestinal tract lesions: a meta-analysis
Source: PubMed Central journal article supplement — Endosc Int Open. 2020 Feb 21;8(3):E313–25. doi: 10.1055/a-1073-7593 (PMC7035039; doi:10.1055/a-1073-7593), 2020-02-21
Supplement: 1435supmat-10-1055-a-1073-7593.pdf [file 1435supmat-10-1055-a-1073-7593.pdf]

## Supplementary Material:

**Supplementary Fig. 1** Publication bias cumulative meta-analysis method.

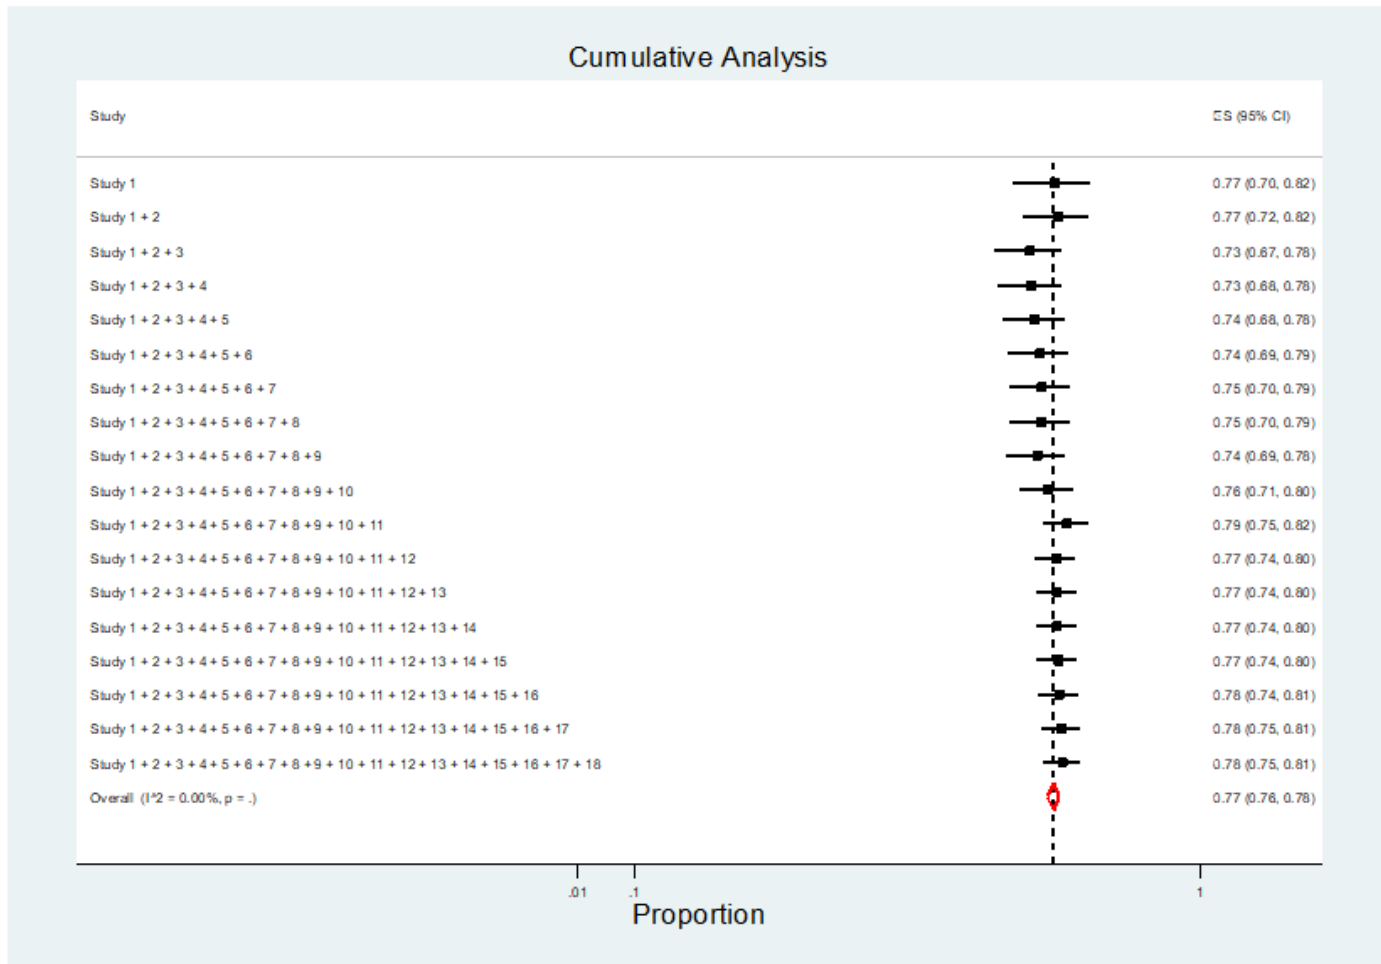

## Search Terms:

### PubMed 187 results 04/22/2019

("over the scope"[tw] OR "over-the-scope"[tw] OR "over-the-scope-clip" OR "OTSC"[tw] OR "full thickness resection device"[tw] OR "full-thickness resection device"[tw] OR "FTRD"[tw] OR ("Endoscopy, Gastrointestinal/instrumentation"[Mesh] OR "Endoscopy, Gastrointestinal/methods"[Mesh] OR "novel device"[tw] OR "novel devices"[tw] OR "new device" OR "new devices"[tw]) AND ("full thickness resection"[tw] OR "full-thickness resection"[tw])) AND ("subepithelial tumors"[tw] OR "subepithelial tumor"[tw] OR "subepithelial lesion"[tw] OR "subepithelial lesions"[tw] OR "subepithelial neoplasm"[tw] OR "subepithelial neoplasms"[tw] OR ((gastric[tw] OR gastrointestinal OR intestinal OR gastrointestine) AND ("cancer"[tw] OR "neoplasm"[tw] OR "neoplasms"[tw] OR "neoplasia"[tw] OR "tumor"[tw] OR "tumour"[tw] OR "tumors"[tw] OR "tumours"[tw] OR "sarcoma"[tw] OR "SETS"[tw] OR "SET"[tw])) OR "gastric SETS"[tw] OR "gastric SET"[tw] OR "gastrointestinal stromal tumor"[tw] OR "gastrointestinal stromal tumors"[tw] OR "GIST"[tw] OR "GISTS"[tw] OR "Gastrointestinal Stromal Neoplasm"[tw] OR "Gastrointestinal Stromal Neoplasms"[tw] OR "Gastrointestinal Stromal Sarcoma"[tw] OR "Gastrointestinal Neoplasm"[tw] OR "Cancer of Gastrointestinal Tract"[tw] OR "gastrointestinal Tract Cancer"[tw] OR "Gastrointestinal Tract Cancers"[tw] OR "Cancer of the Gastrointestinal Tract"[tw] OR "Gastrointestinal Cancer"[tw] OR "Gastrointestinal Cancers"[tw] OR "Gastrointestinal Stromal Tumors"[Mesh] OR "Gastrointestinal Neoplasms"[Mesh]) AND ("full-thickness resection"[tw] OR "full thickness resection"[tw] OR "EFTR"[tw])

---

### Embase 148 results 04/22/2019

('over the scope' OR 'over-the-scope' OR 'over-the-scope-clip' OR 'OTSC' OR 'full thickness resection device' OR 'full-thickness resection device' OR 'FTRD' OR (('gastrointestinal endoscopy'/exp OR 'novel device\*' OR 'new device\*')) AND ('full thickness resection' OR 'full-thickness resection')) AND ('digestive system cancer'/exp OR 'subepithelial tumor\*' OR 'subepithelial lesion\*' OR 'subepithelial neoplasm\*' OR (('gastric' OR 'gastrointestinal' OR 'gastrointestine' OR 'intestinal') AND ('cancer' OR 'neoplasm\*' OR 'neoplasia' OR 'tumor\*' OR 'tumour\*' OR 'sarcoma' OR 'SETS' OR 'SET')) OR 'gastric SETS' OR 'gastric SET' OR 'gastrointestinal stromal tumor\*' OR 'GIST\*' OR 'Gastrointestinal Stromal Neoplasm\*' OR 'Gastrointestinal Stromal Sarcoma' OR 'Gastrointestinal Neoplasm' OR 'Cancer of Gastrointestinal Tract' OR 'gastrointestinal Tract Cancer' OR 'Gastrointestinal Tract Cancers' OR 'Cancer of the Gastrointestinal Tract' OR 'Gastrointestinal Cancer' OR 'Gastrointestinal Cancers' OR 'gastrointestinal tumor'/exp) AND ('full-thickness resection' OR 'full thickness resection' OR 'EFTR')

---

---

### Cochrane 3 results 04/22/2019

| ID | Search Hits                                                                                                                                                    |
|----|----------------------------------------------------------------------------------------------------------------------------------------------------------------|
| #1 | MeSH descriptor: [Endoscopy, Gastrointestinal] explode all trees 4650                                                                                          |
| #2 | "novel device" or "novel devices" or "new device" or "new devices" 592                                                                                         |
| #3 | #1 or #2 5238                                                                                                                                                  |
| #4 | "full thickness resection" or "full-thickness resection" 13                                                                                                    |
| #5 | #3 and #4 1                                                                                                                                                    |
| #6 | "over the scope" or "over-the-scope" or "over-the-scope-clip" or "OTSC" or "full thickness resection device" or "full-thickness resection device" or "FTRD" 15 |
| #7 | #6 and #4 1                                                                                                                                                    |
| #8 | #5 or #7 2                                                                                                                                                     |

---

### Scopus 229 results 04/22/2019

("over the scope" OR "over-the-scope" OR "over-the-scope-clip" OR "OTSC" OR "full thickness resection device" OR "full-thickness resection device" OR "FTRD" OR (("gastrointestinal endoscopy" OR "novel device" OR "novel devices" OR "new device" OR "new devices") AND ("full thickness resection" OR "full-thickness resection"))) AND ("subepithelial tumors" OR "subepithelial tumor" OR "subepithelial lesion" OR "subepithelial lesions" OR "subepithelial neoplasm" OR "subepithelial neoplasms" OR ((gastric OR gastrointestinal OR intestinal OR gastrointestine) AND ("cancer" OR "neoplasm" OR "neoplasms" OR "neoplasia" OR "tumor" OR "tumour" OR "tumors" OR "tumours" OR "sarcoma" OR "SETS" OR "SET"))) OR "gastric SETS" OR "gastric SET" OR "gastrointestinal stromal tumor" OR "gastrointestinal stromal tumors" OR "GIST" OR "GISTS" OR "Gastrointestinal Stromal Neoplasm" OR "Gastrointestinal Stromal Neoplasms" OR "Gastrointestinal Stromal Sarcoma" OR "Gastrointestinal Neoplasm" OR "Cancer of Gastrointestinal Tract" OR "gastrointestinal Tract Cancer" OR "Gastrointestinal Tract Cancers" OR "Cancer of the Gastrointestinal Tract" OR "Gastrointestinal Cancer" OR "Gastrointestinal Cancers" OR "Gastrointestinal Stromal Tumors" OR "Gastrointestinal Neoplasms") AND (ABS ("full-thickness resection" OR "full thickness resection" OR "EFTR"))

---

### Web of Science 53 results 04/22/2019

1. TS=(((("over the scope" OR "over-the-scope" OR "over-the-scope-clip" OR "OTSC" OR "full thickness resection device" OR "full-thickness resection device" OR "FTRD" OR (("gastrointestinal endoscopy" OR "novel device" OR "novel devices" OR "new device" OR "new devices") AND ("full thickness resection" OR "full-thickness resection")))))

2. TS=(("subepithelial tumors" OR "subepithelial tumor" OR "subepithelial lesion" OR "subepithelial lesions" OR "subepithelial neoplasm" OR "subepithelial neoplasms" OR ((gastric OR gastrointestinal OR intestinal OR gastrointestine) AND ("cancer" OR "neoplasm" OR "neoplasms" OR "neoplasia" OR "tumor" OR "tumour" OR "tumors" OR "tumours" OR "sarcoma" OR "SETS" OR "SET"))) OR "gastric SETS" OR "gastric SET" OR "gastrointestinal stromal tumor" OR "gastrointestinal stromal tumors" OR "GIST" OR "GISTS" OR "Gastrointestinal Stromal Neoplasm" OR "Gastrointestinal Stromal Neoplasms" OR "Gastrointestinal Stromal Sarcoma" OR "Gastrointestinal Neoplasm" OR "Cancer of Gastrointestinal Tract" OR "gastrointestinal Tract Cancer" OR "Gastrointestinal Tract Cancers" OR "Cancer of the Gastrointestinal Tract" OR "Gastrointestinal Cancer" OR "Gastrointestinal Cancers" OR "Gastrointestinal Stromal Tumors" OR "Gastrointestinal Neoplasms"))
  
3. TS=((( "full-thickness resection" OR "full thickness resection" OR "EFTR")))
